# Supplementary material for: Cryptic Fitness Advantage: Diploids Invade Haploid Populations Despite Lacking Any Apparent Advantage as Measured by Standard Fitness Assays
Source: PubMed Central journal article supplement (PMC3235103; doi:10.1371/journal.pone.0026599), 2011-12-09
Supplement: pone.0026599.s007.pdf [file pone.0026599.s007.pdf]

**Table S2. Cell volume correlates strongly with surface area, eccentricity and surface area:volume across colonies isolated at generations 1023 & 1302**

|                              | r      | statistic                 |
|------------------------------|--------|---------------------------|
| volume & surface area        | 0.999  | $t_{21}=108.6, p<0.00001$ |
| volume & eccentricity        | 0.857  | $t_{21}=7.60, p<0.00001$  |
| volume & surface area:volume | -0.991 | $t_{21}=-34.5, p<0.00001$ |
